# Supplementary material
Source: PubMed Central journal article supplement (PMC3964114)
Supplement: 1401732111_pnas.201401732SI.pdf [file 1401732111_pnas.201401732SI.pdf]

# Supporting Information

Liu et al. 10.1073/pnas.1401732111

## SI Materials and Methods

**Tamoxifen Injection and Cardiotoxin Injury.** Tamoxifen (Sigma-Aldrich) was dissolved in 90% (vol/vol) sesame oil and 10% (vol/vol) ethanol at 25 mg/mL and delivered to both WT and mutant mice at 8 wk of age by i.p. injection at 0.1 mg/g for 5 d. Cardiotoxin (CTX) from *Naja mossaibica mossaibica* (Sigma-Aldrich) was dissolved in sterile saline to a final concentration of 10  $\mu$ M and aliquoted and stored at  $-20^{\circ}\text{C}$ . Mice were anesthetized by i.p. injection of 2.5% Avertin at (15  $\mu$ L/g). Mouse legs were shaved and cleaned. Tibialis anterior (TA) muscles were injected with 50  $\mu$ L of CTX with a 26-gauge needle. After injection, animals were kept under a warming lamp until recovery. Barium chloride ( $\text{BaCl}_2$ ) injury was performed by injecting 50  $\mu$ L of 1.2%  $\text{BaCl}_2$  (dissolved in sterile saline) into the TA muscle.

**Immunohistochemistry.** Frozen sections were fixed in freshly prepared 4% (vol/vol) paraformaldehyde for 20 min on ice and then treated with 0.3% Triton X-100/PBS at room temperature for 20 min. Sections were incubated with mouse IgG-blocking solution from the M.O.M. kit (Vector Lab) diluted in 0.01% Triton X-100/PBS at room temperature for 1 h. Sections were then incubated with 5% (vol/vol) goat serum (Sigma-Aldrich) in M.O.M. protein diluent for 30 min. Sections were incubated with primary antibodies diluted in M.O.M. protein diluent at  $4^{\circ}\text{C}$  overnight. The next morning, slides were washed with PBS and incubated with secondary antibodies diluted in M.O.M. protein diluent at room temperature for 45 min. Sections were then washed and mounted with VectaShield Mounting Medium with DAPI. Pictures were taken with a Zeiss LSM 510 confocal microscope. Primary and secondary antibodies were as follows: Desmin (1:100; Dako), Laminin (1:200; Sigma-Aldrich), Alexa Fluor 594; goat anti-mouse IgG1 (1:400; Invitrogen), and Alexa Fluor 488 goat anti-rabbit IgG (1:400; Invitrogen).

**Isolation of Satellite Cells by FACS.** Isolation of satellite cells was performed as described. Briefly, hind limb muscles were pooled, minced, and digested with 0.2% Collagenase II (Gibco; Invitrogen), followed by trituration. Satellite cells were then isolated by further digestion of myofibers with 0.1% Dispase (Gibco; Invitrogen) and 0.05% Collagenase II (Gibco; Invitrogen). Cell suspension was filtered through a 40- $\mu$ m cell strainer, and satellite cells were pelleted after centrifugation.

For FACS, satellite cells were counted and resuspended in PBS/3% (wt/vol) BSA at  $1 \times 10^6$  cells per 50  $\mu$ L. Cells were then incubated with the following antibodies for 1 h on ice: APC-CD29 (1:50) (AbD Serotec), PE-labeled rat anti-mouse CD45 (1:100), PE-labeled rat anti-mouse CD31 (1:100), PE-labeled anti-mouse Sca-1 (1:3,000) (all from BD Biosciences-Pharmingen). After incubation, cells were washed twice, filtered through a 40- $\mu$ m cell strainer, and resuspended in PBS/3% (wt/vol) BSA at a concentration of  $2 \times 10^7$  cells per mL. Cells were separated on a MoFlo Cytometer (Beckman Coulter). Sorting gates were strictly defined by the forward scatter and side scatter patterns of satellite cells as well as the positive control cells labeled with Alexa Fluor 488-CD34 and the negative control cells labeled with PE-CD45, PE-CD31, and PE-Sca-1. Cells positive for APC-CD29 and negative for PE-CD45, PE-CD31, and PE-Sca-1 were sorted to enrich for activated satellite cells.

**Culture of Satellite Cell-Derived Myoblasts.** CTX was injected into hind limb muscles and activated satellite cells were isolated 3 d after injection as described (1). Satellite cell-derived myoblasts were cultured on Matrigel-coated (BD Biosciences) plates in growth medium consisting of HAM's F-10 medium, 20% (vol/vol) bovine calf serum, and 5 ng/mL bFGF (Gibco; Invitrogen). Medium was changed daily. Cells were passaged at 70% confluence to prevent spontaneous differentiation. To induce differentiation, cells at 80% confluence were switched to differentiation medium containing DMEM and 2% (vol/vol) horse serum.

**Immunostaining of Satellite Cell-Derived Myoblasts.** For immunostaining, cells were grown on Matrigel-coated coverslips in either growth medium or differentiation medium. Cells were fixed on coverslips with 4% paraformaldehyde for 15 min, washed with PBS, and permeabilized with 0.3% Triton X-100/PBS for 5 min. Cells were blocked with 5% (vol/vol) goat serum/PBS/0.1% Triton X-100 for 3 min, followed by incubation with primary antibodies (diluted in 5% goat serum/PBS/0.1% Triton X-100) for 2 h. Cells were then washed in PBS and incubated with secondary antibodies for 1 h. After washing with PBS, coverslips were mounted on glass slides with VectoLab Mounting Medium (with DAPI). The antibodies used were as follows: anti-Pax7 (1:100, DSHB), MY32 (1:250, Sigma-Aldrich), Alexa Fluor 594 goat anti-mouse IgG1 (for Pax7) (1:400, Invitrogen), and Alexa Fluor 555 goat anti-mouse IgG (for MY32) (1:400, Invitrogen).

**EdU Labeling and Detection.** For cultured cells, EdU supplied in the Click-iT EdU cell proliferation assay kit (Invitrogen) was used as instructed with minor modifications: EdU was used at 10  $\mu$ M for 8 h in culture media; for detection, we performed immunostaining for primary and secondary antibodies (see above) first, then the click chemical reaction using Alexa Fluor 647 as a reactive fluorophore for detection, followed by Hoescht staining.

**Microarray Analysis and Bioinformatics.** For microarray analysis, WT and MEF2-TKO myoblasts were cultured in differentiation medium for 3 d and total RNA was isolated by using TRIzol reagent (Invitrogen). Microarray analysis was performed by the University of Texas Southwestern Microarray Core Facility by using the MouseWG-6 v2.0 BeadChips (Illumina). Gene ontology (GO) analysis was performed by using DAVID with ILLUMINA\_ID identifiers and *Mus musculus* as the background set (2, 3). For GO term enrichment, biological process level 4 was used. MEF2D ChIP-seq peaks from a published study (4) were compared with transcriptional start sites (TSS) of genes from the expression microarray. MEF2D binding sites were considered to be nearby if the ChIP-seq peak overlapped with a 50-bp window around the TSS using a custom script based on the HTSeq python package ([www.huber.embl.de/users/anders/HTSeq/](http://www.huber.embl.de/users/anders/HTSeq/)). PubMed searches were automatically conducted by using a custom script based on Biopython for significantly regulated genes using all known aliases to prevent underestimation of publication number.

**Statistics.** Data are presented as mean  $\pm$  SEM. Differences between groups were tested for statistical significance by using the unpaired two-tailed Student *t* test.  $P < 0.05$  was considered significant.

1. Liu N, et al. (2012) microRNA-206 promotes skeletal muscle regeneration and delays progression of Duchenne muscular dystrophy in mice. *J Clin Invest* 122(6):2054-2065.

2. Huang W, Sherman BT, Lempicki RA (2009) Systematic and integrative analysis of large gene lists using DAVID bioinformatics resources. *Nat Protoc* 4(1):44-57.

3. Huang W, Sherman BT, Lempicki RA (2009) Bioinformatics enrichment tools: paths toward the comprehensive functional analysis of large gene lists. *Nucleic Acids Res* 37 (1):1–13.

4. Sebastian S, et al. (2013) Tissue-specific splicing of a ubiquitously expressed transcription factor is essential for muscle differentiation. *Genes Dev* 27(11): 1247–1259.

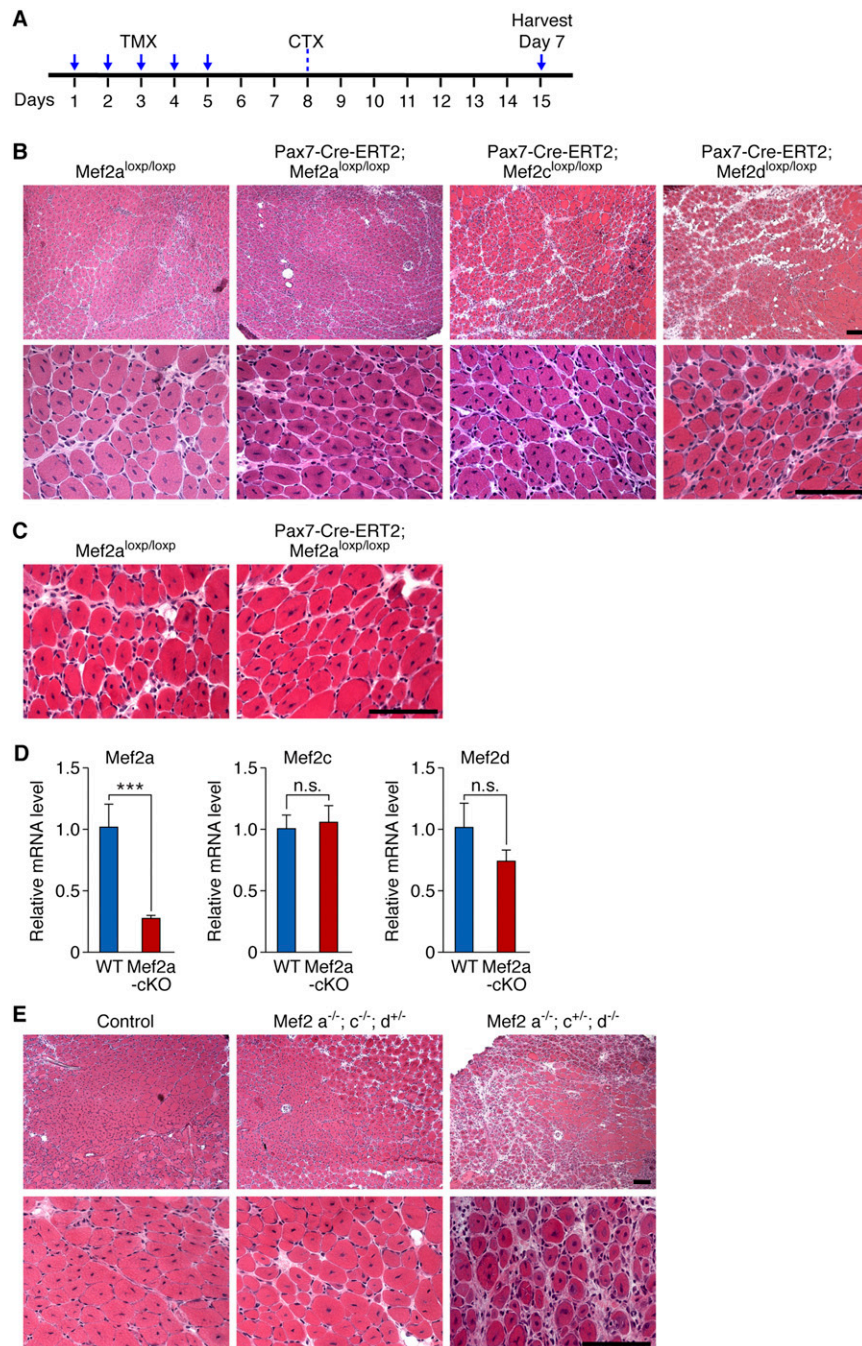

**Fig. S1.** MEF2A, C, and D play redundant roles in adult skeletal muscle regeneration. (A) Schematic of tamoxifen (TMX) and CTX treatment. (B) TA muscles from *Mef2a*<sup>loxp/loxp</sup>; Pax7-Cre-Ert2; *Mef2a*<sup>loxp/loxp</sup>; Pax7-Cre-Ert2; *Mef2c*<sup>loxp/loxp</sup>; and Pax7-Cre-Ert2; *Mef2d*<sup>loxp/loxp</sup> mice were analyzed by H&E staining on day 7 after injury. (C) TA muscles from *Mef2a*<sup>loxp/loxp</sup> and Pax7-Cre-Ert2; *Mef2a*<sup>loxp/loxp</sup> mice were analyzed by H&E staining on day 7 after BaCl<sub>2</sub> injury. (D) TA muscle from WT and Pax7-Cre-Ert2; *Mef2a*<sup>loxp/loxp</sup> (*Mef2a*-cKO) mice was harvested 10 d after CTX injury for RNA analysis of *Mef2a*, *c*, and *d* transcripts by real-time RT-PCR. Values were normalized to 18s rRNA and then normalized to WT. \*\*\**P* < 0.001. ns, not significant. (E) TA muscles from control (*Mef2a*<sup>loxp/loxp</sup>; *2c*<sup>loxp/loxp</sup>; *2d*<sup>loxp/loxp</sup>); *Mef2a*<sup>-/-</sup>; *c*<sup>-/-</sup>; *d*<sup>+/-</sup> (Pax7-Cre-Ert2; *Mef2a*<sup>loxp/loxp</sup>; *2c*<sup>loxp/loxp</sup>; *2d*<sup>loxp/loxp</sup>); and *Mef2a*<sup>-/-</sup>; *c*<sup>+/-</sup>; *d*<sup>-/-</sup> (Pax7-Cre-Ert2; *Mef2a*<sup>loxp/loxp</sup>; *2c*<sup>loxp/loxp</sup>; *2d*<sup>loxp/loxp</sup>) mice were analyzed by H&E staining on day 7 after injury. (Scale bars: 100 μm.)

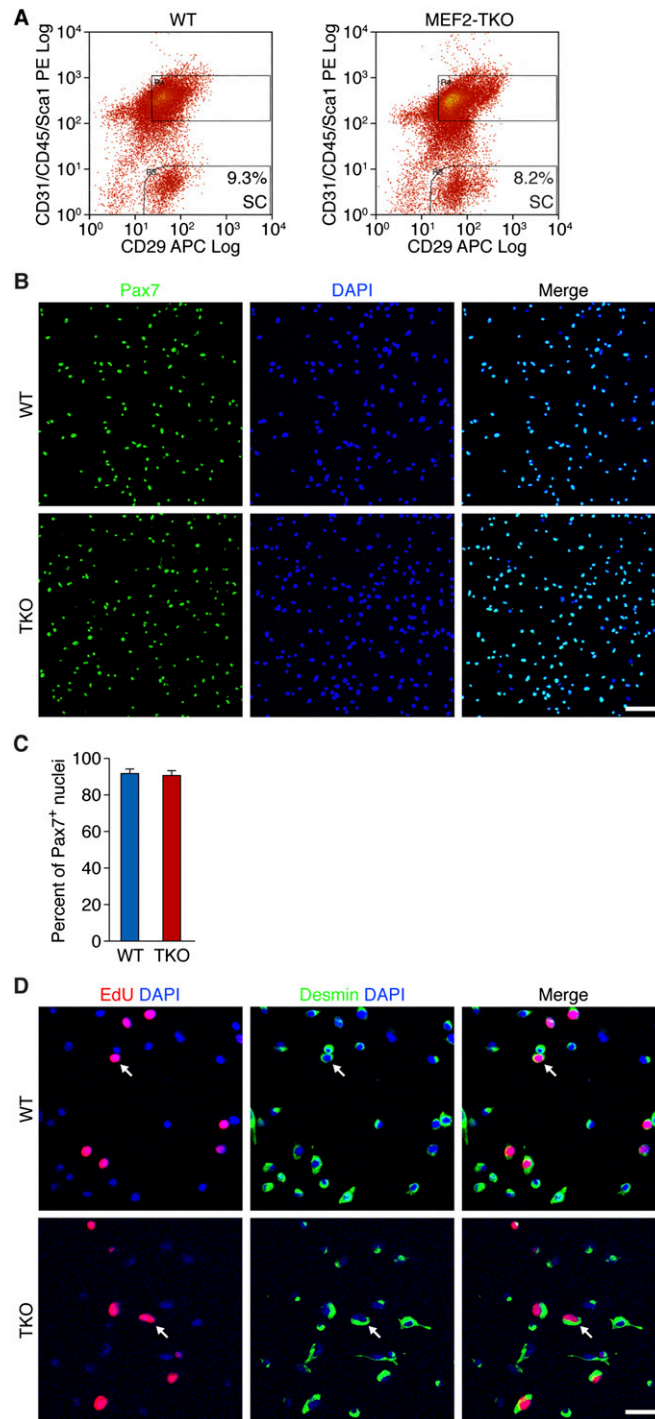

**Fig. S2.** Normal proliferation of MEF2-TKO satellite cell-derived myoblasts. (A) FACS plots of WT and MEF2-TKO-activated satellite cells are shown. Cells were harvested at day 3 after injury. CD29<sup>+</sup> Sca1<sup>-</sup> CD31<sup>-</sup>CD45<sup>-</sup> cells were collected as activated satellite cells. There was no significant difference in the percentage of activated satellite cells between WT and MEF2-TKO mice. SC, satellite cells. (B) Immunostaining for Pax7 in WT and MEF2-TKO myoblasts showed that most cells are Pax7<sup>+</sup> myoblasts. (C) Percentage of Pax7<sup>+</sup> cells in WT and MEF2-TKO were counted and plotted. n.s., not significant. (D) Immunostaining for desmin and EdU in WT and MEF2-TKO myoblasts showed that EdU<sup>+</sup> myoblasts express desmin (arrows). (Scale bars: 100 μm.)



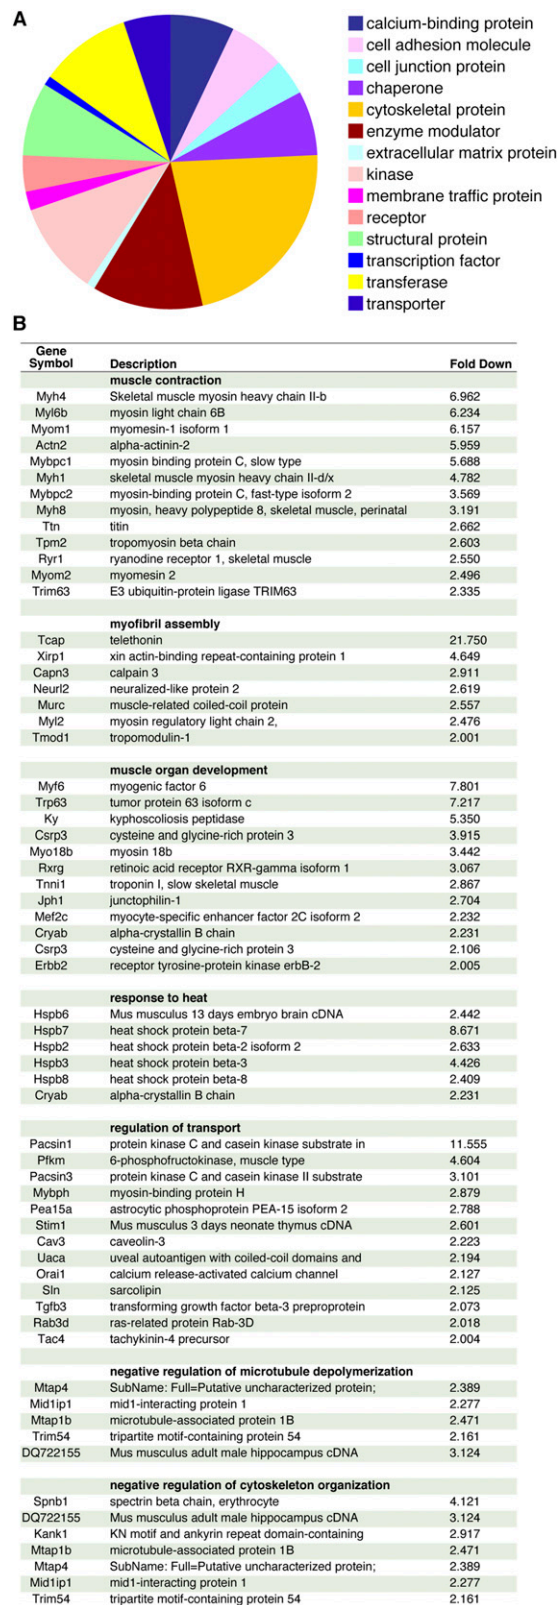

**Fig. S3.** (A) GO analysis was performed with DAVID. Microarray data from WT and MEF2-TKO myotubes were used in the analysis. Protein classes were assigned to the genes that fall in the most significantly enriched biological process "muscle contraction" as presented in Fig. 5D. (B) List of most down-regulated in MEF2-TKO myotubes. Genes were grouped according to GO terms of biological processes by DAVID.

| Gene Symbol   | Description                                                                      | Fold Down | Mef2D Site 50bp Window |
|---------------|----------------------------------------------------------------------------------|-----------|------------------------|
| Myadm2        | myeloid-associated differentiation marker-like                                   | 11.639    | Yes                    |
| 2310002L09Rik | hypothetical protein LOC71886 isoform 2                                          | 9.165     | No                     |
| Dysfp1        | dysferlin-interacting protein 1                                                  | 7.062     | No                     |
| Toeal5        | transcription elongation factor A protein-like                                   | 5.905     | No                     |
| Fam78a        | hypothetical protein LOC241303                                                   | 5.675     | No                     |
| 1500017E21Rik | putative noncoding RNA                                                           | 4.901     | No                     |
| Gm10406       | predicted gene 10406                                                             | 4.614     | No                     |
| Gm3696        | alpha25-takusan                                                                  | 4.609     | No                     |
| AK008705      | RIKEN cDNA 2210011C24 gene                                                       | 4.330     | Yes                    |
| Yipf7         | protein YIPF7                                                                    | 4.293     | Yes                    |
| Dhrs7c        | Dhrs7c dehydrogenase/reductase (SDR family) member 7C                            | 4.147     | Yes                    |
| Adamts15      | ADAMTS-like protein 5 isoform 2                                                  | 4.139     | Yes                    |
| Gm1973        | predicted gene 1973                                                              | 4.094     | No                     |
| Klh30         | kelch-like protein 30                                                            | 3.996     | Yes                    |
| Preli2        | PRELI domain-containing protein 2                                                | 3.928     | No                     |
| Fsd2          | fibronectin type III and SPRY domain-containing                                  | 3.846     | Yes                    |
| AK014378      | putative noncoding RNA                                                           | 3.806     | No                     |
| Ablim2        | actin-binding LIM protein 2 isoform 1                                            | 3.768     | Yes                    |
| AK031097      | protein phosphatase 1 (formerly 2C)-like                                         | 3.533     | No                     |
| AK006812      | putative noncoding RNA                                                           | 3.442     | No                     |
| Toeal7        | transcription elongation factor A (SII)-like 7                                   | 3.401     | No                     |
| Afap111       | actin filament-associated protein 1-like 1                                       | 3.367     | No                     |
| Myom3         | myomesin-3                                                                       | 3.339     | No                     |
| Zdbf2         | DBF4-type zinc finger-containing protein 2                                       | 3.171     | No                     |
| Dennd2c       | DENN domain-containing protein 2C                                                | 3.139     | No                     |
| DQ722155      | integrator complex subunit 6                                                     | 3.124     | No                     |
| AK165804      | putative noncoding RNA                                                           | 3.109     | No                     |
| lfn1          | immunoglobulin-like and fibronectin type III domain containing 1                 | 3.039     | No                     |
| Kbtbd13       | kelch repeat and BTB domain-containing protein                                   | 2.990     | No                     |
| Cacng6        | voltage-dependent calcium channel gamma-6                                        | 2.987     | No                     |
| AK009335      | putative noncoding RNA                                                           | 2.878     | No                     |
| Adamts15      | ADAMTS-like protein 5 isoform 2                                                  | 2.861     | Yes                    |
| Stac2         | SH3 and cysteine-rich domain-containing protein                                  | 2.826     | No                     |
| A830080H07RIK | putative noncoding RNA                                                           | 2.768     | No                     |
| Zfp385c       | zinc finger protein 385C                                                         | 2.765     | No                     |
| Ttc39b        | tetratricopeptide repeat protein 39B                                             | 2.759     | No                     |
| Ntn5          | netrin-5                                                                         | 2.714     | No                     |
| Rftn2         | raftlin-2                                                                        | 2.704     | No                     |
| Gm13305       | interleukin 11 receptor, alpha chain 2-like                                      | 2.680     | No                     |
| NCTC1         | putative noncoding RNA                                                           | 2.643     | No                     |
| Kbtbd5        | kelch repeat and BTB domain-containing protein                                   | 2.620     | Yes                    |
| Lrrc14b       | leucine-rich repeat-containing protein 14B                                       | 2.616     | Yes                    |
| 1700113I22Rik | hypothetical protein LOC73635                                                    | 2.510     | Yes                    |
| Ccdc141       | coiled-coil domain containing 141                                                | 2.504     | Yes                    |
| Fam171a2      | hypothetical protein LOC217219 precursor                                         | 2.456     | No                     |
| Ltrm1         | SubName: Full=Leucine-rich repeats and transmembrane domains 1;                  | 2.444     | No                     |
| Gm10341       | SubName: Full=Putative uncharacterized protein Gm2974;                           | 2.437     | No                     |
| Msd7          | RecName: Full=Major facilitator superfamily domain-containing protein 7;         | 2.415     | No                     |
| Lrrc30        | leucine-rich repeat-containing protein 30                                        | 2.409     | Yes                    |
| Gm3696        | alpha25-takusan                                                                  | 2.404     | No                     |
| BC046404      | RecName: Full=Leucine-rich repeat-containing protein C17orf76 homolog;           | 2.400     | No                     |
| Fam171b       | family with sequence similarity 171, member B                                    | 2.398     | No                     |
| Btd6          | BTB/POZ domain-containing protein 6 isoform 2                                    | 2.392     | No                     |
| Calr4         | calreticulin 4                                                                   | 2.364     | No                     |
| Rliad1        | RliA domain-containing protein C1orf230 homolog                                  | 2.353     | No                     |
| 9930013L23Rik | KIAA1199 homolog precursor                                                       | 2.349     | No                     |
| Gpr146        | probable G-protein coupled receptor 146 isoform                                  | 2.349     | No                     |
| 2610019F03Rik | hypothetical protein LOC72148                                                    | 2.345     | No                     |
| Tmem119       | transmembrane protein 119 precursor                                              | 2.343     | Yes                    |
| Enho          | adropin precursor                                                                | 2.337     | No                     |
| Chst13        | carbohydrate sulfotransferase 13                                                 | 2.334     | No                     |
| Enho          | adropin precursor                                                                | 2.312     | No                     |
| Ablim3        | actin-binding LIM protein 3                                                      | 2.289     | Yes                    |
| Tmem179       | transmembrane protein 179                                                        | 2.283     | No                     |
| Zfp385b       | zinc finger protein 385B isoform 3                                               | 2.280     | No                     |
| 1110028C15Rik | hypothetical protein LOC68691 isoform 2                                          | 2.279     | No                     |
| AK165889      | predicted gene 10419p                                                            | 2.266     | No                     |
| Zfp773        | putative noncoding RNA                                                           | 2.266     | No                     |
| Tmem62        | transmembrane protein 62                                                         | 2.247     | No                     |
| Gm13305       | interleukin 11 receptor, alpha chain 2-like                                      | 2.235     | No                     |
| Myom3         | myomesin-3                                                                       | 2.231     | No                     |
| PAPK-A        | Mus musculus mRNA for polyploidy associated protein kinase PAPK-A, complete cds. | 2.219     | No                     |
| 7030401E22RIK | putative noncoding RNA                                                           | 2.202     | No                     |
| Sel113        | protein sel-1 homolog 3                                                          | 2.178     | No                     |
| 2900026A02Rik | hypothetical protein LOC243219                                                   | 2.173     | No                     |
| Tmem117       | transmembrane protein 117                                                        | 2.168     | Yes                    |
| Mospd1        | motile sperm domain-containing protein 1                                         | 2.165     | No                     |
| BC046404      | RecName: Full=Leucine-rich repeat-containing protein C17orf76 homolog;           | 2.150     | No                     |
| PAPK-A        | Mus musculus mRNA for polyploidy associated protein kinase PAPK-A, complete cds. | 2.123     | No                     |
| Gm3219        | Mus musculus predicted pseudogene 3219 (Gm3219), non-coding RNA.                 | 2.096     | No                     |
| Gm2506        | chemokine (C-C motif) ligand 27b isoform 3                                       | 2.094     | No                     |
| Ccdc92        | coiled-coil domain-containing protein 92                                         | 2.080     | No                     |
| Gm889         | hypothetical protein LOC380755                                                   | 2.025     | No                     |
| BC024659      | hypothetical protein LOC108934                                                   | 2.022     | Yes                    |
| C1qtnf4       | complement C1q tumor necrosis factor-related                                     | 2.011     | No                     |
| Shisa4        | protein shisa-4 precursor                                                        | 2.006     | Yes                    |

Fig. S4. List of uncharacterized or minimally characterized genes that are down-regulated in MEF2-TKO myotubes. Genes that contain MEF2-binding sites near their promoters are indicated as yes.
